## COMMENTARY

# How cells respond to environmental cues – insights from bio-functionalized substrates

Verena Ruprecht<sup>1,2</sup>, Pascale Monzo<sup>3</sup>, Andrea Ravasio<sup>4</sup>, Zhang Yue<sup>4</sup>, Ekta Makhija<sup>4</sup>, Pierre Olivier Strale<sup>5</sup>, Nils Gauthier<sup>3</sup>, G. V. Shivashankar<sup>3,4</sup>, Vincent Studer<sup>5</sup>, Corinne Albiges-Rizo<sup>6</sup> and Virgile Viasnoff<sup>4,7,\*</sup>

**ABSTRACT**

Biomimetic materials have long been the (he)art of bioengineering. They usually aim at mimicking *in vivo* conditions to allow *in vitro* culture, differentiation and expansion of cells. The past decade has witnessed a considerable amount of progress in soft lithography, bio-inspired micro-fabrication and biochemistry, allowing the design of sophisticated and physiologically relevant micro- and nano-environments. These systems now provide an exquisite toolbox with which we can control a large set of physicochemical environmental parameters that determine cell behavior. Bio-functionalized surfaces have evolved from simple protein-coated solid surfaces or cellular extracts into nano-textured 3D surfaces with controlled rheological and topographical properties. The mechanobiological molecular processes by which cells interact and sense their environment can now be unambiguously understood down to the single-molecule level. This Commentary highlights recent successful examples where bio-functionalized substrates have contributed in raising and answering new questions in the area of extracellular matrix sensing by cells, cell–cell adhesion and cell migration. The use, the availability, the impact and the challenges of such approaches in the field of biology are discussed.

**KEY WORDS:** Biomimetic interface, Environmental sensing, *In vitro* culture, Mechanobiology, Mechanosensing, Microniches

**Introduction**

Environment sensing and signaling is increasingly recognized as a set of fundamental pathways that influence cell behavior, cell fate and pathologies. These mechanobiological principles contextualize the gene-expression-centric views that are more traditionally observed in cell biology. Soluble factors, xenobiotic factors, nutrients, oxygen and the chemical nature of the extracellular matrix (ECM) have long been recognized as essential signaling components of the local cellular microniches. However, cells are equally sensitive to some biophysical aspects of the environment, such as the density and mechanical properties of the ECM, physical confinement and mechanical tension, all of which can elicit, inhibit or synchronize cell responses. *In vivo*, all these parameters are largely intertwined. Cell–cell interactions, cell–matrix interactions

and paracrine signaling epitomize a triad of intertwined environmental cues that, at the same time, elicit a cellular response and are modified by the cells. In the past decade, combining molecular biology tools with *in vitro* reductionist approaches involving bio-functionalized micro-fabricated substrates has enabled scientists to identify and understand a growing number of cellular processes that are governed by mechanobiological cues (Fig. 1).

This Commentary reviews recent examples of important processes in the fields of matrix sensing, cell–cell interactions and cell migration that have been elucidated using bio-functionalized surfaces. Many fundamental studies have been carried out in these fields using exclusively molecular and cell biology tools, such as gene editing and gene sequencing. We do not intend to minimize the importance of these approaches. However, this review focuses on the additional insights that were obtained when *in vitro* controls of the cellular micro-environment are applied. For an exhaustive view of each field the reader can refer to more specific reviews (e.g. Bonnans et al., 2014; Cavey and Lecuit, 2009; Kramer et al., 2013).

**Brief overview over bio-functionalized substrates**

Bio-functionalized surfaces are typically substrates with controllable biophysical properties that can elicit specific interactions with cells in a close-to-physiological way. The canonical examples are Petri dishes coated with ECM that has been simply adsorbed on their surface by incubation from a solution. Covalent binding can also be achieved by specific surface chemistry, which ensures proper mechanical coupling with the underlying substrate and reduces any matrix restructuring. The next level of complexity consists of patterning in two-dimensional (2D) adhesive areas. Many techniques can be used to lay down a pattern, with most being micron-scale approaches usually used in the textile industry. These include micro-serigraphy or micro-stenciling, which uses removable membrane with holes of different shapes to mask the exposed area of the surface (Masters et al., 2012; Ostuni et al., 2000), and micro-stamping, which uses soft textured material to ‘ink’ the region of contact with proteins (Piel and Thery, 2014b). Another approach is dip-pen lithography, which uses deposition of protein with a sharp tip (Salaita et al., 2007). Alternatively, deep UV patterning uses polymer degradation under intense light to reveal surfaces with adhesive properties (Azioune et al., 2009). A resolution down to a few hundreds of nanometers can be achieved (Fig. 2A).

Multi-protein printing (Fig. 2A) is enabled by repeating these processes in sequence (Strale et al., 2016). These protein deposition techniques can be used on substrates of various rigidities (Fig. 2B) that range from soft hydrogel (1–10 kPa), elastomers (100 kPa–1 MPa) to glassy materials (GPa) (Piel and Thery, 2014b). However, a caveat should be drawn here. The rheological properties felt by the

<sup>1</sup>Centre for Genomic Regulation (CRG), The Barcelona Institute of Science and Technology, Dr. Aiguader 88, Barcelona 08003, Spain. <sup>2</sup>Universitat Pompeu Fabra (UPF), Barcelona, Spain. <sup>3</sup>IFOM, Via Adamello, 16, Milano 20139, Italy.

<sup>4</sup>Mechanobiology Institute, National University of Singapore, 5A Engineering Drive 1, 117411, Singapore. <sup>5</sup>CNRS, Interdisciplinary Institute for Neuroscience, UMR 5297, Bordeaux F-33000, France. <sup>6</sup>INSERM, U1209, CNRS UMR 5309, Institute for Advanced Biosciences, Institute Albert Bonniot, University Grenoble Alpes, La Tronche F-38700, France. <sup>7</sup>CNRS UMI 3639, 5A Engineering Drive 1, 117411 Singapore.

\*Author for correspondence (virgile.viasnoff@espci.fr)

 V.V., 0000-0003-3949-2244

cells might differ from that of the substrate owing to the adsorption and deformability of the ECM proteins (Smith et al., 2007). The rheological properties of the substrates can also be controlled by adsorbing patterned or unpatterned functionalized supported lipid bilayers with various fluidity (Fig. 2B).

Furthermore, another layer of complexity can be added by imprinting soft or rigid topographic features (e.g. pillars, groves or pits) onto the substrates (Fig. 2C). Most of these substrates are 2D or quasi 2D, although three-dimensional (3D) matrix surrogate hydrogels with controllable properties can also be devised. Inert biocompatible polymeric backbones can be functionalized with proteinaceous residues of a given nature and density. The density of crosslinking sites can also be tailored using different types of molecular reaction (e.g. click chemistry, acrylate based or hydrogen bonds). 3D microstructured rigid substrates can also be fabricated and coated with proteins (Klein et al., 2011) to create fibrillar environments (Fig. 2B). Moreover, microwells can be used to structure the 3D spatial arrangement of cellular adhesion and to create bona fide cellular microniches (Fig. 2A) (Charnley et al., 2012; Li et al., 2016). Substrates with gradients of adhesive properties (Fig. 2D) or properties that vary in time, such as hydrogel with controlled aging rheological properties (DeForest and Tirrell, 2015; Young and Engler, 2011), or patterns with on-demand adhesion (Rolli et al., 2012; Vignaud et al., 2012) have also been designed (Fig. 2D). Table 1 summarizes these approaches and the commercial availability of any such devices.

The principal advantage of using bio-functionalized surfaces is that they provide minimal, standardized and reproducible conditions with defined biochemical and biophysical characteristics for long-term, high-resolution observations of cell behavior. Therefore, their use allows a precise spatio-temporal control of individual environmental parameters that are not easily accessible *in vivo*. Thus, they constitute a tool of choice to precisely investigate the impact of mechanotransduction pathways through which cells feel the surrounding biophysical cues, such as extracellular mechanical properties, mechanical tension, shear flow and geometrical constraints. In addition, they are also instrumental in studying environment-dependent cell responses to soluble factors, such as growth factors, drugs and hormones. Finally, a controlled geometry allows the precise mechanical modeling of cellular functions (Albert and Schwarz, 2016). Specific recent examples are discussed in detail below.

### ECM sensing

Among the different environmental-sensing processes, how cells perceive the molecular and biophysical properties of the ECM surrounding them is by far the most appreciated. Matrix properties can be exquisitely recapitulated *in vitro*. Many different types of secreted matrix can be purified and used for cell culture (Caliari and Burdick, 2016), or even assembled into microarrays to create a micro-screen of matrix-induced responses (Reticker-Flynn et al., 2012). For instance, the signaling from the 24 types of integrins

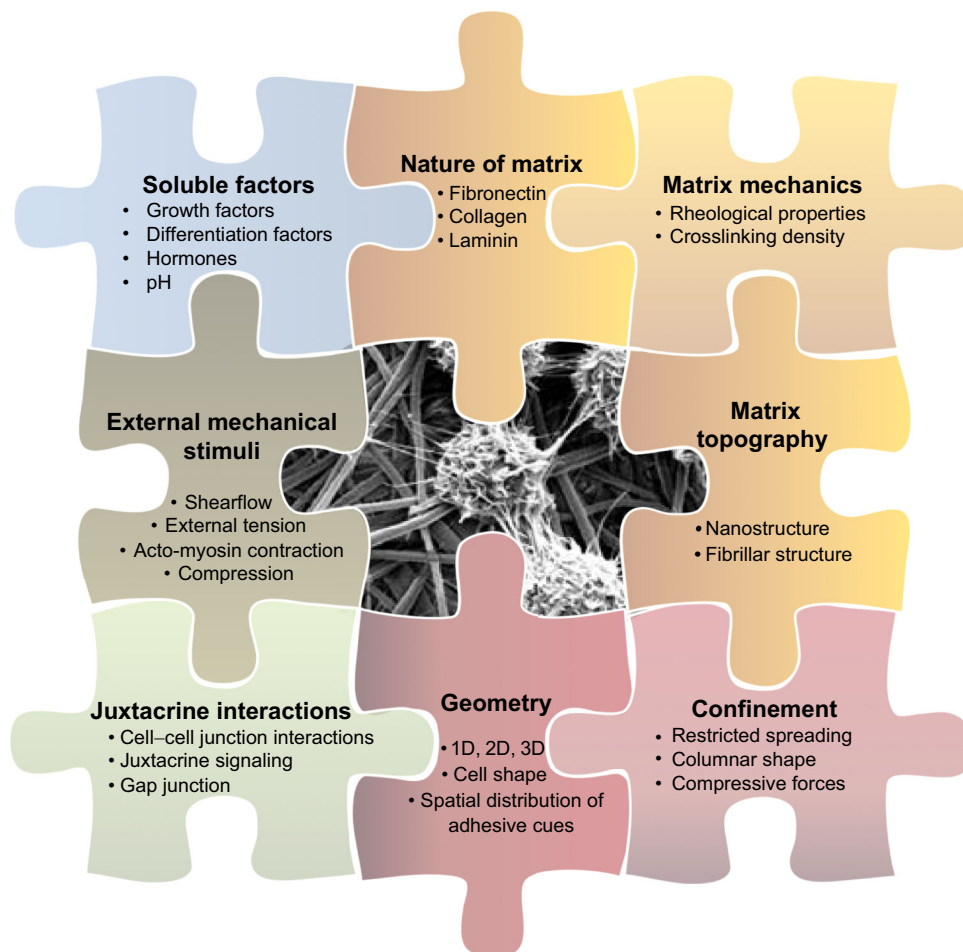

**Fig. 1. Schematic representation of the various biophysical parameters that comprise the local microenvironment surrounding a single cell.** *In vivo* these parameters are largely intertwined and their contribution to cell response can rarely be unambiguously evaluated. Recapitulating and varying one or a combination of each of these parameters using biomimetic interfaces allows us to decipher how cells perceive environmental cues and respond to them. The cell image is courtesy of Professor Hai-Quan Mao, Johns Hopkins University.

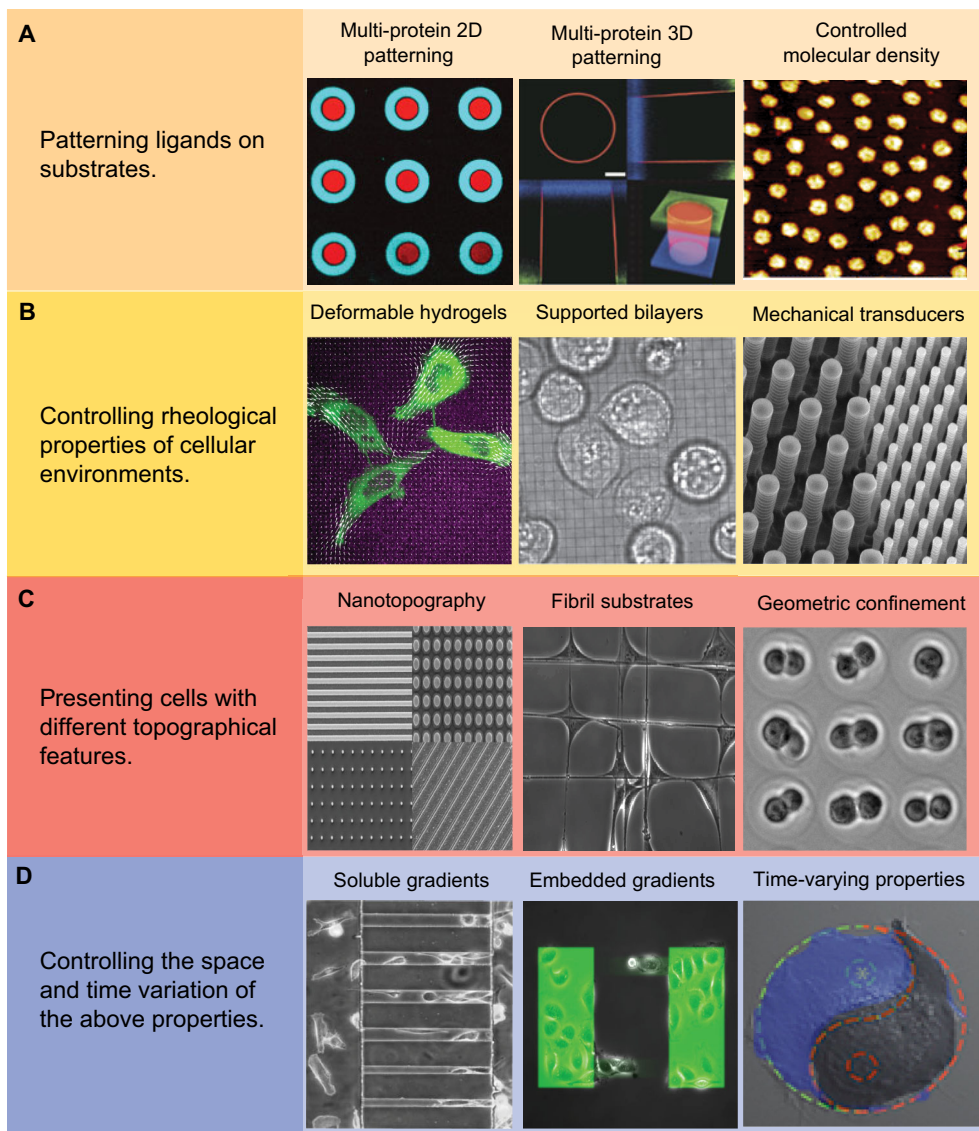

**Fig. 2. Examples of technological solutions to control the cellular environment surrounding cells *in vitro*.** (A) Patterning of different ligands. Left, intricate multi-protein patterns (E-cad in blue, fibronectin in red) made using deep UV patterning; middle, 3D differential protein coating on 20 micron microwells; right, an evenly spaced array of nanogold dots with controlled density of grafted RGD. (B) Examples for controlling the rheological properties of cellular environments. Left, fibroblasts plated on soft polyacrylamide gels; middle, MCF10 cells placed on a biofunctionalized fluid lipid bilayer; right, arrays of deformable micropillars that allow cellular traction measurement. (C) Illustration of how cells can be presented with different topographical features. Left, nanotextured polystyrene substrates with different topography that can enhance stem cell differentiation into a specific lineage; middle, fibroblasts cells migrating in 3D fibril environment; right, cells confined in micropits with precise geometrical properties such as curvature, size and shape. (D) Means to control the properties of the *in vitro* environment in time and space. Left, chemokine gradients generated across microfluidic channels; middle, gradients of fluorescent fibronectin density between two adhesive compartments; right, cell spreading on adhesive pattern before (dark) and after (blue) addition of biotinylated fibronectin, which selectively binds to the upper half of the pattern.

(reviewed in Campbell and Humphries, 2011) has been precisely studied using this approach (Roca-Cusachs et al., 2009).

The simplest substrate is a plastic or glass dish coated with adsorbed matrix proteins. Such a dish has been long used for cell culture, but with the advent of super-resolution microscopy, the ability to image focal adhesions at the single-molecule level led to the discovery of their layered structure and fresh insight as to how this spatial organization enables their function as mechanosensitive signaling hubs (Kanchanawong et al., 2010; Patla et al., 2010).

Single-particle tracking has revealed the dynamic properties of the constitutive integrins dimers involved in focal adhesions. Their successive periods of immobilization and dissociation from the underlying actin cytoskeleton proved to be an important part of their adhesive and signaling role (Rossier et al., 2012). Integrins also require assembling into nanoclusters to be functional. The existence of a maximum distance of 55 nm between two activated integrins prior to triggering of adhesion was shown using RGD-peptide-coated gold nanodots arrays (Arnold et al., 2004; Cavalcanti-Adam and Spatz, 2015; Huang et al., 2009; Liu et al., 2014; Selhuber-Unkel et al., 2008), or nanopatterns of defined spacing and grafting densities (Coyer et al., 2012).

Beyond adhesion, integrin clusters are also essential signaling hubs for mechanosensation. Cells do not only exert mechanical deformation on the matrix but also sense the response of the matrix and react to it. Imaging substrate deformation of continuous gels with fiducial tracers (Oakes et al., 2012; Plotnikov et al., 2014; Soiné et al., 2015) or of flexible pillars (Rahmouni et al., 2013) enables quantitative measurements of cellular traction and cellular response. These approaches have unambiguously revealed that mechanical tension is crucial for the maturation of the focal adhesion (Ghibaudo et al., 2008; Schiller et al., 2013) and for matrix rigidity sensing (Humphrey et al., 2014; Vogel and Sheetz, 2006). Recent studies performed on pillars of 500 nm in diameter have unraveled a mechanism by which cells ‘pinch’ the matrix, thereby assembling a contractile molecular complex (Ghassemi et al., 2012; Meacci et al., 2016; Wolfenson et al., 2016). The signaling downstream of these pinching events is dependent on the mechanical tension that is necessary to contract the functional unit. This provides a mechanism by which cells can sense substrate rigidity. A striking demonstration of this principle was observed by comparing cell spreading on glass substrates, nano-corralled lipid bilayers and fully fluid bilayers bio-functionalized with identical



**Table 1. Overview of the available biofunctionalized substrates**

| Type                                              | Approach                                                                                                                                                                                          | Reviews                                                                                         | Commercial availability                                                                                           | Biological applications                                                                                                                                                                                                                                                                        |
|---------------------------------------------------|---------------------------------------------------------------------------------------------------------------------------------------------------------------------------------------------------|-------------------------------------------------------------------------------------------------|-------------------------------------------------------------------------------------------------------------------|------------------------------------------------------------------------------------------------------------------------------------------------------------------------------------------------------------------------------------------------------------------------------------------------|
| Substrates with structured protein coating        |                                                                                                                                                                                                   |                                                                                                 |                                                                                                                   |                                                                                                                                                                                                                                                                                                |
| 2D protein printing                               | Stamping (SQ)<br>Stenciling (SQ)<br>Light induced (Q)                                                                                                                                             | Piel and Thery, 2014a,b<br>D'Arcangelo and McGuigan, 2015<br>Ricoult et al., 2015               | Innopsys<br>Alveole<br>Cytoc                                                                                      | 2D confinement, forcing cell size and shape<br>Forcing cytoskeleton organization<br>Inducing of front/rear polarization<br>Restricting migration<br>Inducing nuclear stress<br>Spatially organizing cell culture<br>Quantitative interactions with ligand<br>High- or super-resolution imaging |
| 3D protein patterning                             | On microstructures (SQ)<br>Two photons (Q)                                                                                                                                                        | No relevant reviews available                                                                   | Nanoscribe                                                                                                        |                                                                                                                                                                                                                                                                                                |
| Nanoprinting                                      | Nanodots (Q)<br>Dip pen lithography (NQ)<br>Nanostenciling (SQ)                                                                                                                                   | Ru et al., 2014<br>Salaita et al., 2007<br>Ross et al., 2012<br>Custódio et al., 2014           | Innopsys                                                                                                          |                                                                                                                                                                                                                                                                                                |
| Substrates with controlled rheological properties |                                                                                                                                                                                                   |                                                                                                 |                                                                                                                   |                                                                                                                                                                                                                                                                                                |
| Hydrogels or soft elastomers                      | Biomimetic/extract of ECM (SQ), control of ligand density and growth factors<br>Functionalizable hydrogels of various rigidity (e.g. PEG, PAA, haluric acid) (Q)<br>Particle-filled hydrogels (Q) | Piel and Thery, 2014a,b<br>Ross et al., 2012<br>Sant et al., 2010                               | In Sphero<br>Qgel<br>IBIDI/Advanced<br>BioMatrix                                                                  | 3D vs 2D cell culture<br>Adhesion on soft substrates<br>Traction force microscopy<br>Spatial clustering of surface receptors<br>Cooperative signaling from receptor clusters<br>Rigidity sensing<br>Migration in absence of adhesion<br>Matrix-dependent cellular response                     |
| Functionalized lipid bilayers                     | Supported lipid bilayers functionalized with ligand (Q)<br>Nanostructured bilayers (Q) (e.g. nanopatterned, nanofences)<br>Multilayered lipid substrate with various rigidity (SQ)                | Castellana and Cremer, 2006<br>Yu and Groves, 2010<br>Groves, 2007<br>Tanaka and Sackmann, 2005 | eDAQ                                                                                                              |                                                                                                                                                                                                                                                                                                |
| Micro-textured substrates                         | Micropillars/nanopillars of various length, diameters and densities (Q)                                                                                                                           | No relevant reviews available                                                                   | NCA                                                                                                               |                                                                                                                                                                                                                                                                                                |
| Substrates with topographic features              |                                                                                                                                                                                                   |                                                                                                 |                                                                                                                   |                                                                                                                                                                                                                                                                                                |
| Micro-textured substrates                         | Micro-fabricated topographic features on rigid substances (Q)<br>Flexible pillars for force transduction (Q)<br>Micro-cavities or micro-containers (Q)                                            | Bettinger et al., 2009<br>Nikkhah et al., 2012                                                  | Mechanobiology Institute<br>Nunc<br>Microsurfaces<br>Aggrewell                                                    | Curvature or topography sensing<br>Enhanced stem cell differentiation<br>Mechanical stress measurements (single-cell analysis or organoids)<br>Induction of front-rear polarization<br>3D migration<br>Confined migration<br>Chemotaxis<br>Effect of fluidic shear                             |
| Nano-textured substrates                          | Planar substrates with nanofeatures (Q)<br>Electrospun nanofibers<br>Nano silicon/graphene fibers                                                                                                 | Lim and Donahue, 2007<br>Kim et al., 2012<br>Baharvand, 2015                                    | NCA                                                                                                               |                                                                                                                                                                                                                                                                                                |
| Microfluidics                                     | 3D channels for migration assays<br>Flow chambers<br>Soluble factor gradient generators                                                                                                           | Dupin et al., 2013                                                                              | Celiasic ONIX<br>Millipore<br>IBIDI<br>Gradienttech<br>Fluxion<br>BellBrook Labs<br>Hurel<br>Kirkstall<br>Mimetas |                                                                                                                                                                                                                                                                                                |

Abbreviations: NCA, no current commercial availability; NQ, non quantitative; PAA, polyacrylic acid; PEG, polyethylene glycol; Q, quantitative; SQ, semi-quantitative.

densities of RGD peptides (Yu et al., 2011). As the substrate became more fluid, cells were unable to exert any mechanical load on the engaged integrin clusters, preventing the maturation of focal adhesions; this caused the cells to round up. A combination of these approaches has also revealed that talin, a multidomain protein localized to focal adhesion, sequentially unfolds under various mechanical loads, thus serving as a ‘mechanical ruler’ (del Rio et al., 2009; Hu et al., 2016; Margadant et al., 2011; Yao et al., 2014, 2016). This constitutes the best-understood mechanism (although it is not unique) by which cells can sense the level of force they exert.

By using stenciling membranes to constrain the extent of cell spreading, a seminal study demonstrated that a minimal value for cell spreading is required to avoid cell death (anoikis) (Chen et al., 1997).

It is now increasingly clear that rapid events (over a timeframe of seconds to minutes) for rigidity sensing directly influence the activity of transcription factors (Fourel et al., 2016; Petropoulos et al., 2016; Renz et al., 2015), and ultimately cell behavior and fate (Inman et al., 2015). As an example, apical polarization has been shown to be highly dependent on matrix organization (Akhtar and Streuli, 2013; Rodríguez-Fraticelli et al., 2012). In this context, the mechanotransduction role of  $\beta 1$  and  $\beta 3$  integrins was singled out (Fourel et al., 2016; Schiller et al., 2013). In addition, 2D and 3D protein printing has demonstrated how the spatial structuration of the adhesive environment influences the localization (Rodríguez-Fraticelli et al., 2012) and shapes (Li et al., 2016) of apical lumens. Epithelial morphogenesis has also been found to depend on the biophysical properties of surrogate matrix gels (Enemchukwu et al., 2016). The 2D confinement of cells on ECM patterns was also shown to elicit the translocation of the co-transcription factors YAP and TAZ from the nucleus to the cytoplasm. This provides a molecular basis for signaling pathways that regulate cell proliferation in a manner that depends on cell confinement and confluence (Dupont et al., 2011).

In addition, the curvature of ECM micropits has been found to control the branching morphogenesis of epithelium, and this demonstrates the importance of the geometry of cell confinement (Nelson et al., 2006). Last but not least, the rheological properties of the matrix, cellular confinement and geometrical constraints have all been found to have a crucial role in stem cell differentiation and cell fate reprogramming (Engler et al., 2006). Paradigm-shifting experiments have demonstrated that biophysical cues interfere with cell differentiation programs and contribute to the cell lineage commitment (Engler et al., 2006; Gilbert et al., 2010; Wen et al., 2014). Stem cell differentiation has emerged as being a combination of a response to soluble factors and an integrated response to environmental factors, including geometrical, rheological and topographical cues (Discher et al., 2009; Griffin et al., 2015; Murphy et al., 2014). Consequently, a fundamental understanding of cell differentiation, as well as technical solutions to enhance cell differentiation, has been drawn from these observations. In this perspective, how mechanical properties of the substrate are transduced to the nucleus to trigger mechanosensitive control over genomic programs is being intensely scrutinized. A possibility emerges that geometrical constraints impinge on nuclear morphologies (Li et al., 2014; Oakes et al., 2014; Versaevel et al., 2012), chromatin compaction states (Makhija et al., 2016) and chromosome territories (Thomas et al., 2002). Here, the cytoskeletal rearrangements that are induced by the spatial structuration and confinement of the adhesive area result in nuclear reorganization and genome reprogramming. Taken together, all these studies illustrate the long-term downstream consequences of rapid

environmental sensing process. The biggest challenges in this area are to unravel the routes by which early pathways of environmental-sensing signal to transcriptional, genomic and epigenomic programs downstream. As outlined above, the tools required to answer these questions are ready and await use by the different communities of biologists.

### Cell–cell interactions

ECM factors are crucial for microniche signaling. However, cell–cell interactions need to be considered to an equal extent as an environment signaling cue. Technological developments required to unravel downstream consequences of sensing at cell–cell junctions are lagging behind those used for cell–ECM adhesion. Understanding the mechanobiology of intercellular contacts is intrinsically a multi-component, interconnected problem (as compared to the interactions between a single cell and ECM or soluble factors). A cell both responds to and serves as a ‘substrate’ for its neighbors. Bio-functionalized materials thus could be instrumental in decoupling both aspects. Indeed, new methodologies are being developed to achieve a degree of control similar to that obtained for cell–ECM interactions as outlined below.

For instance, the type of measurements described for ECM substrates can be utilized for substrates that have been functionalized with cell–cell adhesion proteins, such as E- or N-cadherins (Plestant et al., 2014; Vega et al., 2014) or antigens (Plestant et al., 2014). Studies with E-cadherin (E-cad)-coated substrates have revealed the existence of E-cad nanoclusters as fundamental units for cell–cell adhesion, and their existence has been confirmed by super-resolution imaging of mammalian cell–cell contacts (Wu et al., 2015; Strale et al., 2015), as well as in *Drosophila* (Truong Quang et al., 2013). In addition, both E- and N-cad-coated deformable pillars allow the measurement of the traction forces that are exerted by a single cell across cadherin bonds. Mechanical traction was found to be in the order of 5 to 10 nN per square micron (Ganz et al., 2006; Ladoux et al., 2010). An alternative approach consists of fluorescence resonance energy transfer (FRET)-based force sensors coupled to E-cad to measure the mechanical load that is placed on the adhesion molecule; it amounts to be  $\sim 2$  pN for each E-cad molecule that is engaged in a real cell–cell contact (Borghi et al., 2012). Taken together, these measurements point towards a mechanical tension exerted at the adherens junction that is of the order of 100 nN (for a junction of  $\sim 10$   $\mu\text{m}$  in length). These approaches have also revealed that there are strong structural similarities in cortical organization between the mechanical responses of the ECM (i.e. integrin-based) and those of cadherins. Similarly, the spreading mechanisms of macrophages on an antigen-presenting glass (Vega et al., 2014) has been shown to be dynamically and structurally similar to that of fibroblasts spreading on fibronectin. Taken together, these results indicate that there is a universal cytoskeleton organization for the development of force, which is based on cluster adhesion, force-mediated reinforcement and the development of traction fibers. This also raises questions as to whether these organizing principles arise primarily owing to the way the adhesive ligands are presented to the cells (i.e. soluble, on a fluid substrate, or immobilized) and if the nature of the receptors plays a role. This issue has been illustrated by the different cellular responses elicited by identical growth factors depending on whether they are soluble or attached to the surrounding matrix (Crouzier et al., 2011).

The use of bio-functionalized lipid bilayers is also well suited to address these types of questions. Adhesive ligands can be coupled to phospholipids and incorporated into the supported lipid bilayer

at controlled densities. Furthermore, the mobility of the ligands in the bilayer can be varied from fluid to static. The cells are thus left free to reorganize spatially the ligand–receptor pairs. E-cad cluster formation was found to be highly dependent on the viscous drag felt by aggregated ligands on the bilayer. On fluid bilayers, the clusters were unstable and transient (Biswas et al., 2015; Perez et al., 2005). In contrast, reduced diffusion of E-cad (by varying the bilayer fluidity or binding to the cytoskeleton) stabilized the cluster, strengthened the adhesion and redistributed the adhesive zones along the edge of the surrogate contact into a morphology that is reminiscent of the apical actin belt (Biswas et al., 2015). This observed morphology shares many similarities with real cell–cell contacts that are established between two suspended cells (Engl et al., 2014; Maitre et al., 2012). To our knowledge, similar observations have not been reported for integrin-mediated adhesion. Taken together, these observations indicate that the reorganization of the actin cytoskeleton to which adhesive clusters transiently bind is both responsible for and dependent on the biophysical properties and spatio-temporal distribution of these adhesive ligands. The ability of actin flows to organize and segregate ligand–receptor pairs at cell–cell contacts has been best demonstrated by using bio-functionalized lipid bilayers as a surrogate for immunological synapses. Imaging of these surrogate substrates has revealed the segregation of different immune receptor pairs into concentric regions called central supramolecular activation clusters (cSMACs), peripheral SMACs (pSMACs) and distal SMACs (dSMACs). This demonstrates that the actin-based spatial segregation of the different receptor signals is key to eliciting the immunological response of the T-cell (Dustin and Groves, 2012; Groves, 2007; Pagoon et al., 2016; Tanaka and Sackmann, 2005; Yu and Groves, 2010).

The supported bilayer approach has also been used with other classes of intercellular receptors. For example, it has been shown that the signaling downstream of the binding of EPHA2, a receptor tyrosine kinase involved in cell motility and organ boundary formation, to an ephrin-A1-functionalized bilayer largely depends on the size and spatial structuration of the ligand receptors cluster (Greene et al., 2014; Salaita et al., 2010). The misregulation of this force-activated pathway has also been found to be a hallmark of the metastatic potential of breast cancer cells (Salaita et al., 2010).

One can devise a third approach for using bio-functionalized substrates to study cell–cell adhesion. ECM patterning can be used to indirectly force cells to interact with each other in a controlled manner. For example, 2D bow-shape patterns have been used to measure the traction force that two cells exert on each other as the imbalance of the mechanical tension they exert on the substrate (Liu et al., 2010; Maruthamuthu et al., 2011; Ng et al., 2014). 2D ECM geometrical patterns have also been used to show that adherens junctions orient away from ECM adhesion (Mertz et al., 2013; Sim et al., 2015; Tseng et al., 2012). This idea was recently extended in 3D to differential protein printing in small pits. When coated with an anti-fouling treatment, they provide ideal substrates to perform en-face imaging of junction formation between two stacked cells (Engl et al., 2014) or during mitosis (Wollrab et al., 2016). Coating pits with different proteins on their top, sides and bottom allows exquisite control over cell–cell interactions that are induced by matrix adhesion in 3D. This approach has been recently used to reveal how intercellular tension guides the luminogenesis in hepatocytes (Li et al., 2016). Embedding micromirrors in close vicinity to these micropits enables 3D super-resolution imaging of cells in their environment with a sectioning capability of up to tens of microns above the coverslip (Galland et al., 2015).

Taken together, we believe that the recent technological developments and the growing number of studies focusing on mechanotransduction at cell–cell contacts will bring this field to the same level of understanding as has been obtained for cell–ECM adhesion. We anticipate that this will also result in a better understanding of how environmental factors act as spatially structured triggers for cell polarization and organogenesis.

### Cell migration

The substrates described so far are characterized by a structured but homogenous bio-functionalization. Spatial gradients or properties that vary over time can also be built in to study directed cell migration (taxis). For instance, patterning with light-induced release of adhesive constraints (Rolli et al., 2012; Vignaud et al., 2012) has been used to study the transition from static to migratory behaviors. Our understanding of migration along gradients of soluble factors (chemotaxis) has benefited from microfluidics, where gradients of soluble factors that are transverse to the direction of microfluidic flow can be created (Chung and Choo, 2010; King et al., 2016; Li Jeon et al., 2002; Toh et al., 2014). Passive diffusion of a chemoattractant across a porous membrane has also been used to create local gradients in the absence of flow (Dupin et al., 2013). Furthermore, imprinting of protein gradients on rigid substrates (Ricoult et al., 2015; Wu et al., 2011) or controlled stenciling and/or photo-immobilization techniques (Bélisle et al., 2009, 2012; Strale et al., 2016) has revealed the molecular basis for haptotaxis, the migration of cells along an ECM gradient. In addition, the use of 3D matrix hydrogels containing smooth gradients of crosslinking density (i.e. to create a ECM with differing concentrations of crosslinking components) (Millon-Frémillon et al., 2008) has provided insights into how macrophages migrate along gradients of differing matrix stiffnesses (i.e. durotaxis) (Nemir and West, 2010). Finally, a recent study employed traction force microscopy on hydrogels with an embedded stiffness gradient to demonstrate that cells can collectively sense large-scale matrix density gradients resulting in collective durotaxis (Sunyer et al., 2016).

In absence of directional cues, spontaneous modes of collective cell migration are also found to largely correlate with the physical constraints of the environment. Removal of a physical obstacle from an ECM-coated substrate allows monolayers of epithelial cells to suddenly access a surface where cells are free to migrate. This migration assay with controlled boundary conditions results in a large-scale, swirling collective motion within the monolayer, as well as in the appearance of ‘leader cells’ with distinct migratory characteristics (Poujade et al., 2007). Cell swirls largely depend on the lateral confinement of the monolayer (Deforet et al., 2014; Doxzen et al., 2013; Rørth, 2012; Tanner et al., 2012; Vedula et al., 2013). The emergence of this synchronized collective cell motion can be correlated with contractile waves that involve multiple cells as measured by traction force microscopy (Angelini et al., 2010; Serra-Picamal et al., 2012). The existence of leader cells is also an indication that cells can migrate by using different modes of motility. Indeed, it has been shown that switching between different modes of migration can be elicited by environmental cues (te Boekhorst et al., 2016).

The various modes of cell migration can be recapitulated by *in vitro* reconstitution of idealized migration conditions (Charras and Sahai, 2014; Friedl and Wolf, 2010; Rao et al., 2014). Here, bio-functionalized substrates provide an excellent platform to understand how differences in spatio-temporal coordination of an identical pool of regulators (e.g. Rho GTPases) and cytoskeleton effectors (e.g. myosin II, Arp2/3, formins and filamin A) trigger the

**Box 1. Co-culture of cells organized in 3D**

In most of the studies described here, the controlled microenvironment is applied to a single cell type or to the study of homotypic interactions. However, an increasing number of studies now aim to co-culture different cell types in a spatially structured manner in order to better recapitulate cell–cell interactions within tissues or organs. To that end, 3D microchannels (~200- $\mu\text{m}$  wide) created in an ECM hydrogel can be used to culture endothelial cells; this mimics blood vessels, and interactions of endothelial cells with cancer or stromal cells can be investigated (Jeon et al., 2015; Miller et al., 2012; Shin et al., 2011). In addition, 2D protein patterns have been used to localize hepatocyte islands amidst an interacting fibroblast layer, which has been shown to result in enhanced bile production (Bhatia and Ingber, 2014). Finally, a fast developing method for cell culture in 3D is to create organoids, with cells being grown either in hanging drops or in an ECM surrogate (Clevers, 2016; Fatehullah et al., 2016; Yin et al., 2016). The development of tissue-specific organoids relies on the provision of soluble factors and on the self-organization of the cells therein as they grow. We anticipate that extending our control over cell culture in 3D to being able to induce the interactions between different cell types in 3D-structured organoids will advance our capability to culture tissue *in vitro*, as well as increase our knowledge of how the spatial structuration of the environment influences cell fate.

activation of distinct cytoskeleton protrusions, which ultimately lead to different migration modes. The ‘world cell race’ (Maiuri et al., 2012) is an iconic example of how migration conditions can be standardized over an extensive roster of cell types, and migration speed and migration persistence of 50 cell types has been probed on one-dimensional (1D) ECM-coated lines. Extending these findings to 2D and 3D *in vitro* and *in vivo* environments has led to a comprehensive understanding of how actin flows mediate a universal (1D, 2D and 3D) coupling between these parameters (Maiuri et al., 2015). 1D migration has been further shown to favor filopodia-driven migration of fibroblasts (Guo and Wang, 2012), with cells adopting elongated spindle-like shapes (Chang et al., 2013; Doyle et al., 2012; Guo and Wang, 2012; Monzo et al., 2016). When various mammalian cells, such as transformed or untransformed fibroblasts and cancer cell lines, including glioma and carcinoma of various origin, migrate along ECM-printed lines, their motility mode becomes intermittent, or saltatory, similar to that described for neuronal motility (Guo and Wang, 2012; Irimia and Toner, 2009; Monzo et al., 2016; Pathak and Kumar, 2012). This contrasts with the ‘classic’ gliding migration of fibroblasts or keratinocytes on 2D surfaces, which results from the dynamic protrusion of a lamellipodium at the front of the polarized cell and a contractile actomyosin network at its rear (Verkhovskiy et al., 1999). Formins play a crucial role in generating and organizing the long actin cables that are necessary to support the elongated shape of the cells during 1D migration (Monzo et al., 2016; Vargas et al., 2016; Wilson et al., 2013), whereas Arp2/3 is more crucial for migration in 2D. Furthermore, if cell migration takes place on suspended electrospun nanofibers coated with ECM (Johnson et al., 2009), free actin waves propagate from the cell body to the tip of the cellular protrusion. This occurs in an asymmetric manner to polarize the movement of long spindle-shaped cells (Guetta-Terrier et al., 2015). These thin actin protrusions differ in nature from the bulky actin protrusions, which are used to crawl across the matrix pores and termed lobopodia, that appear when cells move in a dense 3D matrix (Petrie et al., 2012). The use of a 3D matrix with controlled pore sizes has also enabled the investigation of mechanical nuclear deformation during migration and its consequences for DNA damage (Petrie et al., 2014; Raab et al., 2016; Thiam et al., 2016).

Control over the cellular microenvironment has not only revealed the existence of different modes of migration, but has also provided insights into how exactly cells switch from one mode of motility to another (Friedl and Alexander, 2011). Non-adherent confining substrates, which can be created by microchannels (Bergert et al., 2015) or with a double layer of inert hydrogel (Ruprecht et al., 2015; Liu et al., 2015), have been shown to induce a myosin-II-dependent switch to an amoeboid migration mode that involves the formation of a stable, bleb-like and actin-depleted protrusion at the cell front (Bergert et al., 2015; Liu et al., 2015; Ruprecht et al., 2015). These studies have also determined that the driving force for this amoeboid migration mode is due to a reverse actin flow mediated by non-specific friction between the cell and its substrate.

Taken together, as outlined above, by being able to control the cellular environment *in vitro*, many of the environmental parameters and migration modes that are observed in different *in vivo* contexts, such as embryogenesis, wound healing, metastasis, neuron development or the inflammatory response, can be recapitulated and further investigated in detail.

**Conclusions and perspectives**

The primary advantage of using bio-functionalized surfaces is that they provide the ability to isolate and vary a single environmental parameter in order to unambiguously decipher its contribution to a given cellular process. Combining these interfaces with imaging at the nanometer scale and the genetic alteration of cells is key to understanding the molecular and cellular processes by which cells sense their environment. It is increasingly clear that cells do not exist in a single state, but rather are able to switch between different programs that dictate their behavior. However, the decision to engage in a certain state is not only dictated by secreted or soluble factors, but is made in conjunction with probing of the microenvironment. In that sense, environmental cues can be seen as external triggers of autonomous cell programs. Testing the extent to which an individual environmental cue triggers a specific program is a promising approach to being able to understand the molecular pathways by which cells engage into such programs, or how their behavior (such as drug resistance and differentiation) is conditioned by their microniche. We would like to argue here that there is already a technical solution to recreate most of the environmental parameters individually *in vitro*. Developing a single approach that allows for a combinatorial control over all environmental factors will be crucial to building platforms that will allow cells to be able to sense the entire cellular environment (Dolatshahi-Pirouz et al., 2014; Gobaa et al., 2011). In particular, precisely combining two or more ligands within an engineered environment has already helped to unravel the combinatorial interplay of different adhesive pathways. For example, an increasing number of studies scrutinize the crosstalk between integrins and growth factors (Fourel et al., 2016; Lee et al., 2011), as well as between integrins and cadherins (Borghi et al., 2010; Stapleton et al., 2014), by incorporating one factor at a time in order to generate *in vitro* the essential aspects of *in vivo* complexity. Because the downstream consequences of environmental sensing most likely originate from the integrated signaling of combined environmental cues, it is important to reconstruct the complexity of the microniche from individually controlled cues. The combination of the minimal number of external cues needed to trigger an emergent cellular property or differentiation or polarization program could thus be deciphered. Another challenge that awaits the field is to extend the technological know-how and biological knowledge that has been acquired at the single cell level to extend to co-cultures of cells in 3D. These systems are expected to provide insights into the environmental



cues required for the formation of multi-cell type organoids. These concepts are being developed in so-called ‘organ-on-a-chip’ approaches (see Box 1).

The examples described above illustrate the popularity and usefulness of bio-functionalized surfaces in cell biology over the last decade. Their development and use is clearly an area where biology, physics and engineering overlap. However, the need for multidisciplinary expertise still impedes access of many laboratories to these techniques. Although the commercial availability of these technologies is growing (see Table 1), the particular tools offered will always be based on economical profits and thus most likely limit the extent and capability of the devices that can be purchased. As many of the substrates described above can be realized with a combination of soft lithography techniques and protein and/or lipid adsorption, the scientific community would benefit greatly from the creation of an open-source global repository of these devices, similar to that Addgene provides for plasmids. To that end, the Mechanobiology Institute in Singapore is committed to offering such a tool to the community. It actively seeks academic partners to complete an online declaration of interest to raise starting funds for the initiative (<http://www.mechanobio.info/resources/pdms-survey/>).

#### Acknowledgements

The authors acknowledge the kind help of Steven Wolf and Andrew Wong in proofreading the manuscript. V.V. thanks the microfabrication facility at MBI for providing images of microstructured substrates.

#### Competing interests

V.S. is a founding member of Alveole.

#### Funding

A grant from the National Research Foundation Singapore to the Mechanobiology Institute, Singapore supported this work. V.R. acknowledges support of the Spanish Ministry of Economy and Competitiveness (Ministerio de Economía y Competitividad) ‘Centro de Excelencia Severo Ochoa 2013–2017’.

#### References

- Akhtar, N. and Streuli, C. H. (2013). An integrin-ILK-microtubule network orients cell polarity and lumen formation in glandular epithelium. *Nat. Cell Biol.* **15**, 17–27.
- Albert, P. J. and Schwarz, U. S. (2016). Modeling cell shape and dynamics on micropatterns. *Cell Adh. Migr.* **10**, 516–528.
- Angelini, T. E., Hannezo, E., Trepast, X., Fredberg, J. J. and Weitz, D. A. (2010). Cell migration driven by cooperative substrate deformation patterns. *Phys. Rev. Lett.* **104**, 168104.
- Arnold, M., Cavalcanti-Adam, E. A., Glass, R., Blümmel, J., Eck, W., Kantele, M., Kessler, H. and Spatz, J. P. (2004). Activation of integrin function by nanopatterned adhesive interfaces. *Chemphyschem* **5**, 383–388.
- Azioune, A., Storch, M., Bornens, M., Théry, M. and Piel, M. (2009). Simple and rapid process for single cell micro-patterning. *Lab. Chip* **9**, 1640–1642.
- Baharvand, H. (2015). *Stem Cell Nanoengineering*. Hoboken, New Jersey, Wiley-Blackwell.
- Bélisle, J. M., Kunik, D. and Costantino, S. (2009). Rapid multicomponent optical protein patterning. *Lab. Chip* **9**, 3580–3585.
- Bélisle, J. M., Levin, L. A. and Costantino, S. (2012). High-content neurite development study using optically patterned substrates. *PLoS ONE* **7**, e35911.
- Bergert, M., Erzberger, A., Desai, R. A., Aspalter, I. M., Oates, A. C., Charras, G., Salbreux, G. and Paluch, E. K. (2015). Force transmission during adhesion-independent migration. *Nat. Cell Biol.* **17**, 524–529.
- Bettinger, C. J., Langer, R. and Borenstein, J. T. (2009). Engineering substrate topography at the micro- and nanoscale to control cell function. *Angew. Chem. Int. Ed. Engl.* **48**, 5406–5415.
- Bhatia, S. N. and Ingber, D. E. (2014). Microfluidic organs-on-chips. *Nat. Biotechnol.* **32**, 760–772.
- Biswas, K. H., Hartman, K. L., Yu, C.-h., Harrison, O. J., Song, H., Smith, A. W., Huang, W. Y., Lin, W.-C., Guo, Z., Padmanabhan, A. et al. (2015). E-cadherin junction formation involves an active kinetic nucleation process. *Proc. Natl. Acad. Sci. USA* **112**, 10932–10937.
- Bonnans, C., Chou, J. and Werb, Z. (2014). Remodelling the extracellular matrix in development and disease. *Nat. Rev. Mol. Cell Biol.* **15**, 786–801.
- Borghini, N., Lowndes, M., Maruthamuthu, V., Gardel, M. L. and Nelson, W. J. (2010). Regulation of cell motile behavior by crosstalk between cadherin- and integrin-mediated adhesions. *Proc. Natl. Acad. Sci. USA* **107**, 13324–13329.
- Borghini, N., Sorokina, M., Shcherbakova, O. G., Weis, W. I., Pruitt, B. L., Nelson, W. J. and Dunn, A. R. (2012). E-cadherin is under constitutive actomyosin-generated tension that is increased at cell-cell contacts upon externally applied stretch. *Proc. Natl. Acad. Sci. USA* **109**, 12568–12573.
- Caliori, S. R. and Burdick, J. A. (2016). A practical guide to hydrogels for cell culture. *Nat. Methods* **13**, 405–414.
- Campbell, I. D. and Humphries, M. J. (2011). Integrin structure, activation, and interactions. *Cold Spring Harb. Perspect. Biol.* **3**, a004994.
- Castellana, E. T. and Cremer, P. S. (2006). Solid supported lipid bilayers: from biophysical studies to sensor design. *Surf. Sci. Rep.* **61**, 429–444.
- Cavalcanti-Adam, E. A. and Spatz, J. P. (2015). Receptor clustering control and associated force sensing by surface patterning: when force matters. *Nanomedicine* **10**, 681–684.
- Cavey, M. and Lecuit, T. (2009). Molecular bases of cell-cell junctions stability and dynamics. *Cold Spring Harb. Perspect. Biol.* **1**, a002998.
- Chang, S. S., Guo, W.-h., Kim, Y. and Wang, Y.-l. (2013). Guidance of cell migration by substrate dimension. *Biophys. J.* **104**, 313–321.
- Charnley, M., Kroschewski, R. and Textor, M. (2012). The study of polarisation in single cells using model cell membranes. *Integr. Biol.* **4**, 1059–1071.
- Charras, G. and Sahai, E. (2014). Physical influences of the extracellular environment on cell migration. *Nat. Rev. Mol. Cell Biol.* **15**, 813–824.
- Chen, C. S., Mrksich, M., Huang, S., Whitesides, G. M. and Ingber, D. E. (1997). Geometric control of cell life and death. *Science* **276**, 1425–1428.
- Chung, B. G. and Choo, J. (2010). Microfluidic gradient platforms for controlling cellular behavior. *Electrophoresis* **31**, 3014–3027.
- Clevers, H. (2016). Modeling development and disease with organoids. *Cell* **165**, 1586–1597.
- Coyer, S. R., Singh, A., Dumbauld, D. W., Calderwood, D. A., Craig, S. W., Delamarche, E. and Garcia, A. J. (2012). Nanopatterning reveals an ECM area threshold for focal adhesion assembly and force transmission that is regulated by integrin activation and cytoskeleton tension. *J. Cell Sci.* **125**, 5110–5123.
- Crouzier, T., Fourel, L., Boudou, T., Albigès-Rizo, C. and Picart, C. (2011). Presentation of BMP-2 from a soft biopolymeric film unveils its activity on cell adhesion and migration. *Adv. Mater.* **23**, H111–H118.
- Custódio, C. A., Reis, R. L. and Mano, J. F. (2014). Engineering biomolecular microenvironments for cell instructive biomaterials. *Adv. Healthc. Mater.* **3**, 797–810.
- D’Arcangelo, E. and McGuigan, A. P. (2015). Micropatterning strategies to engineer controlled cell and tissue architecture in vitro. *BioTechniques* **58**, 13–23.
- DeForest, C. A. and Tirrell, D. A. (2015). A photoreversible protein-patterning approach for guiding stem cell fate in three-dimensional gels. *Nat. Mater.* **14**, 523–531.
- Deforet, M., Hakim, V., Yevick, H. G., Duclos, G. and Silberzan, P. (2014). Emergence of collective modes and tri-dimensional structures from epithelial confinement. *Nat. Commun.* **5**, 3747.
- del Rio, A., Perez-Jimenez, R., Liu, R., Roca-Cusachs, P., Fernandez, J. M. and Sheetz, M. P. (2009). Stretching single talin rod molecules activates vinculin binding. *Science* **323**, 638–641.
- Discher, D. E., Mooney, D. J. and Zandstra, P. W. (2009). Growth factors, matrices, and forces combine and control stem cells. *Science* **324**, 1673–1677.
- Dolatshahi-Pirouza, A., Nikkhab, M., Gaharwar, A. K., Hashmi, B., Guermani, E., Aliabadi, H., Camci-Unal, G., Ferrante, T., Foss, M., Ingber, D. E. et al. (2014). A combinatorial cell-laden gel microarray for inducing osteogenic differentiation of human mesenchymal stem cells. *Sci. Rep.* **4**, 3896.
- Doxzen, K., Vedula, S. R. K., Leong, M. C., Hirata, H., Gov, N. S., Kabla, A. J., Ladoux, B. and Lim, C. T. (2013). Guidance of collective cell migration by substrate geometry. *Integr. Biol.* **5**, 1026–1035.
- Doyle, A. D., Kutys, M. L., Conti, M. A., Matsumoto, K., Adelstein, R. S. and Yamada, K. M. (2012). Micro-environmental control of cell migration—myosin IIA is required for efficient migration in fibrillar environments through control of cell adhesion dynamics. *J. Cell Sci.* **125**, 2244–2256.
- Dupin, I., Dahan, M. and Studer, V. (2013). Investigating axonal guidance with microdevice-based approaches. *J. Neurosci.* **33**, 17647–17655.
- Dupont, S., Morsut, L., Aragona, M., Enzo, E., Giullitti, S., Cordenonsi, M., Zanconato, F., Le Dégabel, J., Forcato, M., Bicciato, S. et al. (2011). Role of YAP/TAZ in mechanotransduction. *Nature* **474**, 179–183.
- Dustin, M. L. and Groves, J. T. (2012). Receptor signaling clusters in the immune synapse. *Annu. Rev. Biophys.* **41**, 543–556.
- Enemchukwu, N. O., Cruz-Acuña, R., Bongiorno, T., Johnson, C. T., Garcia, J. R., Sulchek, T. and Garcia, A. J. (2016). Synthetic matrices reveal contributions of ECM biophysical and biochemical properties to epithelial morphogenesis. *J. Cell Biol.* **212**, 113–124.
- Engl, W., Arasi, B., Yap, L. L., Thiery, J. P. and Viasnoff, V. (2014). Actin dynamics modulate mechanosensitive immobilization of E-cadherin at adherens junctions. *Nat. Cell Biol.* **16**, 587–594.
- Engler, A. J., Sen, S., Sweeney, H. L. and Discher, D. E. (2006). Matrix elasticity directs stem cell lineage specification. *Cell* **126**, 677–689.
- Fatehullah, A., Tan, S. H. and Barker, N. (2016). Organoids as an in vitro model of human development and disease. *Nat. Cell Biol.* **18**, 246–254.
- Fourel, L., Valat, A., Faurobert, E., Guillot, R., Bourrin-Reynard, I., Ren, K., Lafanechere, L., Planus, E., Picart, C. and Albigès-Rizo, C. (2016). beta3



- integrin-mediated spreading induced by matrix-bound BMP-2 controls Smad signaling in a stiffness-independent manner. *J. Cell Biol.* **212**, 693-706.
- Friedl, P. and Alexander, S.** (2011). Cancer invasion and the microenvironment: plasticity and reciprocity. *Cell* **147**, 992-1009.
- Friedl, P. and Wolf, K.** (2010). Plasticity of cell migration: a multiscale tuning model. *J. Cell Biol.* **188**, 11-19.
- Galland, R., Grecni, G., Aravind, A., Viasnoff, V., Studer, V. and Sibarita, J.-B.** (2015). 3D high- and super-resolution imaging using single-objective SPIM. *Nat. Methods* **12**, 641-644.
- Ganz, A., Lambert, M., Saez, A., Silberzan, P., Buguin, A., Mège, R. M. and Ladoux, B.** (2006). Traction forces exerted through N-cadherin contacts. *Biol. Cell* **98**, 721-730.
- Ghassemi, S., Meacci, G., Liu, S., Gondarenko, A. A., Mathur, A., Rocca-Cusachs, P., Sheetz, M. P. and Hone, J.** (2012). Cells test substrate rigidity by local contractions on submicrometer pillars. *Proc. Natl. Acad. Sci. USA* **109**, 5328-5333.
- Ghibaudo, M., Saez, A., Trichet, L., Xayaphoumine, A., Browaeys, J., Silberzan, P., Buguin, A. and Ladoux, B.** (2008). Traction forces and rigidity sensing regulate cell functions. *Soft Mat.* **4**, 1836-1843.
- Gilbert, P. M., Havenstrite, K. L., Magnusson, K. E. G., Sacco, A., Leonardi, N. A., Kraft, P., Nguyen, N. K., Thrun, S., Lutolf, M. P. and Blau, H. M.** (2010). Substrate elasticity regulates skeletal muscle stem cell self-renewal in culture. *Science* **329**, 1078-1081.
- Gobaa, S., Hoehnel, S., Rocco, M., Negro, A., Kobel, S. and Lutolf, M. P.** (2011). Artificial niche microarrays for probing single stem cell fate in high throughput. *Nat. Methods* **8**, 949-955.
- Greene, A. C., Lord, S. J., Tian, A., Rhodes, C., Kai, H. and Groves, J. T.** (2014). Spatial organization of EphA2 at the cell-cell interface modulates transendocytosis of ephrinA1. *Biophys. J.* **106**, 2196-2205.
- Griffin, M. F., Butler, P. E., Seifalian, A. M. and Kalaskar, D. M.** (2015). Control of stem cell fate by engineering their micro and nanoenvironment. *World J. Stem Cells* **7**, 37-50.
- Groves, J.** (2007). Supported lipid bilayers as mimics for cell surfaces and as tools in biotechnology. In *BioMEMS and Biomedical Nanotechnology: Volume III Therapeutic Micro/Nanotechnology* (ed. M. Ferrari, T. Desai and S. Bhatia), pp. 305-323. Boston, MA: Springer US.
- Guetta-Terrier, C., Monzo, P., Zhu, J., Long, H., Venkatraman, L., Zhou, Y., Wang, P. P., Chew, S. Y., Mogilner, A., Ladoux, B. et al.** (2015). Protrusive waves guide 3D cell migration along nanofibers. *J. Cell Biol.* **211**, 683-701.
- Guo, W.-h. and Wang, Y.-l.** (2012). A three-component mechanism for fibroblast migration with a contractile cell body that couples a myosin II-independent propulsive anterior to a myosin II-dependent resistive tail. *Mol. Biol. Cell* **23**, 1657-1663.
- Hu, X., Jing, C., Xu, X., Nakazawa, N., Cornish, V. W., Margadant, F. M. and Sheetz, M. P.** (2016). Cooperative vinculin binding to talin mapped by time-resolved super resolution microscopy. *Nano Lett.* **16**, 4062-4068.
- Huang, J., Gräter, S. V., Corbellini, F., Rinck, S., Bock, E., Kemkemer, R., Kessler, H., Ding, J. and Spatz, J. P.** (2009). Impact of order and disorder in RGD nanopatterns on cell adhesion. *Nano Lett.* **9**, 1111-1116.
- Humphrey, J. D., Dufresne, E. R. and Schwartz, M. A.** (2014). Mechanotransduction and extracellular matrix homeostasis. *Nat. Rev. Mol. Cell Biol.* **15**, 802-812.
- Inman, J. L., Robertson, C., Mott, J. D. and Bissell, M. J.** (2015). Mammary gland development: cell fate specification, stem cells and the microenvironment. *Development* **142**, 1028-1042.
- Irimia, D. and Toner, M.** (2009). Spontaneous migration of cancer cells under conditions of mechanical confinement. *Integr. Biol.* **1**, 506-512.
- Jeon, J. S., Bersini, S., Gilardi, M., Dubini, G., Charest, J. L., Moretti, M. and Kamm, R. D.** (2015). Human 3D vascularized organotypic microfluidic assays to study breast cancer cell extravasation. *Proc. Natl. Acad. Sci. USA* **112**, 214-219.
- Johnson, J., Nowicki, M. O., Lee, C. H., Chiocca, E. A., Viapiano, M. S., Lawler, S. E. and Lannutti, J. J.** (2009). Quantitative analysis of complex glioma cell migration on electrosputable polycaprolactone using time-lapse microscopy. *Tissue Eng. Part C Methods* **15**, 531-540.
- Kanchanawong, P., Shtengel, G., Pasapera, A. M., Ramko, E. B., Davidson, M. W., Hess, H. F. and Waterman, C. M.** (2010). Nanoscale architecture of integrin-based cell adhesions. *Nature* **468**, 580-584.
- Kim, D.-H., Provenzano, P. P., Smith, C. L. and Levchenko, A.** (2012). Matrix nanotopography as a regulator of cell function. *J. Cell Biol.* **197**, 351-360.
- King, S. J., Asokan, S. B., Haynes, E. M., Zimmerman, S. P., Rotty, J. D., Alb, J. G., Jr, Tagliatela, A., Blake, D. R., Lebedeva, I. P., Marston, D. et al.** (2016). Lamellipodia are crucial for haptotactic sensing and response. *J. Cell Sci.* **129**, 2329-2342.
- Klein, F., Richter, B., Striebel, T., Franz, C. M., von Freymann, G., Wegener, M. and Bastmeyer, M.** (2011). Two-component polymer scaffolds for controlled three-dimensional cell culture. *Adv. Mater.* **23**, 1341-1345.
- Kramer, N., Walzl, A., Unger, C., Rosner, M., Krupitza, G., Hengstschläger, M. and Dolznig, H.** (2013). In vitro cell migration and invasion assays. *Mutat. Res.* **752**, 10-24.
- Ladoux, B., Anon, E., Lambert, M., Rabodzey, A., Hersen, P., Buguin, A., Silberzan, P. and Mège, R.-M.** (2010). Strength dependence of cadherin-mediated adhesions. *Biophys. J.* **98**, 534-542.
- Lee, K., Silva, E. A. and Mooney, D. J.** (2011). Growth factor delivery-based tissue engineering: general approaches and a review of recent developments. *J. R. Soc. Interface* **8**, 153-170.
- Li, Q., Kumar, A., Makhija, E. and Shivashankar, G. V.** (2014). The regulation of dynamic mechanical coupling between actin cytoskeleton and nucleus by matrix geometry. *Biomaterials* **35**, 961-969.
- Li, Q., Zhang, Y., Pluchon, P., Robens, J., Herr, K., Mercade, M., Thiery, J.-P., Yu, H. and Viasnoff, V.** (2016). Extracellular matrix scaffolding guides lumen elongation by inducing anisotropic intercellular mechanical tension. *Nat. Cell Biol.* **18**, 311-318.
- Li Jeon, N., Baskaran, H., Dertinger, S. K., Whitesides, G. M., Van de Water, L. and Toner, M.** (2002). Neutrophil chemotaxis in linear and complex gradients of interleukin-8 formed in a microfabricated device. *Nat. Biotechnol.* **20**, 826-830.
- Lim, J. Y. and Donahue, H. J.** (2007). Cell sensing and response to micro- and nanostructured surfaces produced by chemical and topographic patterning. *Tissue Eng.* **13**, 1879-1891.
- Liu, Z., Tan, J. L., Cohen, D. M., Yang, M. T., Sniadecki, N. J., Ruiz, S. A., Nelson, C. M. and Chen, C. S.** (2010). Mechanical tugging force regulates the size of cell-cell junctions. *Proc. Natl. Acad. Sci. USA* **107**, 9944-9949.
- Liu, Y., Medda, R., Liu, Z., Galior, K., Yehl, K., Spatz, J. P., Cavalcanti-Adam, E. A. and Salaita, K.** (2014). Nanoparticle tension probes patterned at the nanoscale: impact of integrin clustering on force transmission. *Nano Lett.* **14**, 5539-5546.
- Liu, Y.-J., Le Berre, M., Lautenschlaeger, F., Maiuri, P., Callan-Jones, A., Heuzé, M., Takaki, T., Voituriez, R. and Piel, M.** (2015). Confinement and low adhesion induce fast amoeboid migration of slow mesenchymal cells. *Cell* **160**, 659-672.
- Maitre, J.-L., Berthoumieux, H., Krens, S. F. G., Salbreux, G., Jülicher, F., Paluch, E. and Heisenberg, C.-P.** (2012). Adhesion functions in cell sorting by mechanically coupling the cortices of adhering cells. *Science* **338**, 253-256.
- Maiuri, P., Terriac, E., Paul-Gilloteaux, P., Vignaud, T., McNally, K., Onuffer, J., Thorn, K., Nguyen, P. A., Georgoulia, N., Soong, D. et al.** (2012). The first World Cell Race. *Curr. Biol.* **22**, R673-R675.
- Maiuri, P., Rupprecht, J.-F., Wieser, S., Rupprecht, V., Bénichou, O., Carpi, N., Coppey, M., De Beco, S., Gov, N., Heisenberg, C.-P. et al.** (2015). Actin flows mediate a universal coupling between cell speed and cell persistence. *Cell* **161**, 374-386.
- Makhija, E., Jokhun, D. S. and Shivashankar, G. V.** (2016). Nuclear deformability and telomere dynamics are regulated by cell geometric constraints. *Proc. Natl. Acad. Sci. USA* **113**, E32-E40.
- Margadant, F., Chew, L. L., Hu, X., Yu, H., Bate, N., Zhang, X. and Sheetz, M.** (2011). Mechanotransduction in vivo by repeated talin stretch-relaxation events depends upon vinculin. *PLoS Biol.* **9**, e1001223.
- Maruthamuthu, V., Sabass, B., Schwarz, U. S. and Gardel, M. L.** (2011). Cell-ECM traction force modulates endogenous tension at cell-cell contacts. *Proc. Natl. Acad. Sci. USA* **108**, 4708-4713.
- Masters, T., Engl, W., Weng, Z. L., Arasi, B., Gauthier, N. and Viasnoff, V.** (2012). Easy fabrication of thin membranes with through holes. Application to protein patterning. *PLoS ONE* **7**, e44261.
- Meacci, G., Wolfenson, H., Liu, S., Stachowiak, M. R., Iskratsch, T., Mathur, A., Ghassemi, S., Gauthier, N., Tabdanov, E., Lohner, J. et al.** (2016). alpha-actinin links ECM rigidity sensing contractile units with periodic cell edge retractions. *Mol. Biol. Cell*, mbc.E16-02-0107.
- Mertz, A. F., Che, Y., Banerjee, S., Goldstein, J. M., Rosowski, K. A., Revilla, S. F., Niessen, C. M., Marchetti, M. C., Dufresne, E. R. and Horsley, V.** (2013). Cadherin-based intercellular adhesions organize epithelial cell-matrix traction forces. *Proc. Natl. Acad. Sci. USA* **110**, 842-847.
- Miller, J. S., Stevens, K. R., Yang, M. T., Baker, B. M., Nguyen, D.-H. T., Cohen, D. M., Toro, E., Chen, A. A., Galie, P. A., Yu, X. et al.** (2012). Rapid casting of patterned vascular networks for perfusable engineered three-dimensional tissues. *Nat. Mater.* **11**, 768-774.
- Millon-Frémillon, A., Bouvard, D., Grichine, A., Manet-Dupé, S., Block, M. R. and Albiges-Rizo, C.** (2008). Cell adaptive response to extracellular matrix density is controlled by ICAP-1-dependent beta1-integrin affinity. *J. Cell Biol.* **180**, 427-441.
- Monzo, P., Chong, Y. K., Guetta-Terrier, C., Krishnasamy, A., Sathe, S. R., Yim, E. K. F., Ng, W. H., Ang, B. T., Tang, C., Ladoux, B. et al.** (2016). Mechanical confinement triggers glioma linear migration dependent on formin FHOD3. *Mol. Biol. Cell* **27**, 1246-1261.
- Murphy, W. L., McDevitt, T. C. and Engler, A. J.** (2014). Materials as stem cell regulators. *Nat. Mater.* **13**, 547-557.
- Nelson, C. M., VanDuijn, M. M., Inman, J. L., Fletcher, D. A. and Bissell, M. J.** (2006). Tissue geometry determines sites of mammary branching morphogenesis in organotypic cultures. *Science* **314**, 298-300.
- Nemir, S. and West, J. L.** (2010). Synthetic materials in the study of cell response to substrate rigidity. *Ann. Biomed. Eng.* **38**, 2-20.
- Ng, M. R., Besser, A., Brugge, J. S. and Danuser, G.** (2014). Mapping the dynamics of force transduction at cell-cell junctions of epithelial clusters. *ELife* **3**, e03282.

- Nikkhah, M., Edalat, F., Manoucheri, S. and Khademhosseini, A. (2012). Engineering microscale topographies to control the cell-substrate interface. *Biomaterials* **33**, 5230–5246.
- Oakes, P. W., Beckham, Y., Stricker, J. and Gardel, M. L. (2012). Tension is required but not sufficient for focal adhesion maturation without a stress fiber template. *J. Cell Biol.* **196**, 363–374.
- Oakes, P. W., Banerjee, S., Marchetti, M. C. and Gardel, M. L. (2014). Geometry regulates traction stresses in adherent cells. *Biophys. J.* **107**, 825–833.
- Ostuni, E., Kane, R., Chen, C. S., Ingber, D. E. and Whitesides, G. M. (2000). Patterning mammalian cells using elastomeric membranes. *Langmuir* **16**, 7811–7819.
- Pageon, S. V., Tabarin, T., Yamamoto, Y., Ma, Y., Bridgeman, J. S., Cohnen, A., Benzing, C., Gao, Y., Crowther, M. D., Tungatt, K. et al. (2016). Functional role of T-cell receptor nanoclusters in signal initiation and antigen discrimination. *Proc. Natl. Acad. Sci. USA* **113**, E5454–E5463.
- Pathak, A. and Kumar, S. (2012). Independent regulation of tumor cell migration by matrix stiffness and confinement. *Proc. Natl. Acad. Sci. USA* **109**, 10334–10339.
- Patla, I., Volberg, T., Elad, N., Hirschfeld-Warneken, V., Grashoff, C., Fässler, R., Spatz, J. P., Geiger, B. and Medalia, O. (2010). Dissecting the molecular architecture of integrin adhesion sites by cryo-electron tomography. *Nat. Cell Biol.* **12**, 909–915.
- Perez, T. D., Nelson, W. J., Boxer, S. G. and Kam, L. (2005). E-cadherin tethered to micropatterned supported lipid bilayers as a model for cell adhesion. *Langmuir* **21**, 11963–11968.
- Petrie, R. J., Gavara, N., Chadwick, R. S. and Yamada, K. M. (2012). Nonpolarized signaling reveals two distinct modes of 3D cell migration. *J. Cell Biol.* **197**, 439–455.
- Petrie, R. J., Koo, H. and Yamada, K. M. (2014). Generation of compartmentalized pressure by a nuclear piston governs cell motility in a 3D matrix. *Science* **345**, 1062–1065.
- Petropoulos, S., Edsgård, D., Reinius, B., Deng, Q., Panula, S. P., Codeluppi, S., Plaza Reyes, A., Linnarsson, S., Sandberg, R. and Lanner, F. (2016). Single-cell RNA-Seq reveals lineage and X chromosome dynamics in human preimplantation embryos. *Cell* **165**, 1012–1026.
- Piel, M. and Thery, M. (2014a). Methods in Cell Biology Micropatterning in Cell Biology Part B Volume 120 Preface. In *Micropatterning in Cell Biology, Pt B*, vol. 120 (ed. M. Piel and M. Thery), pp. XV–XVI. San Diego: Elsevier Academic Press Inc.
- Piel, M. and Thery, M. (2014b). *Micropatterning in Cell Biology, Part A, Part B, Part C*. United States: Elsevier Academic Press Inc.
- Plestant, C., Strale, P.-O., Seddiki, R., Nguyen, E., Ladoux, B. and Mege, R.-M. (2014). Adhesive interactions of N-cadherin limit the recruitment of microtubules to cell-cell contacts through organization of actomyosin. *J. Cell Sci.* **127**, 1660–1671.
- Plotnikov, S. V., Sabass, B., Schwarz, U. S. and Waterman, C. M. (2014). High-resolution traction force microscopy. *Methods Cell Biol.* **123**, 367–394.
- Poujade, M., Grasland-Mongrain, E., Hertzog, A., Jouanneau, J., Chavrier, P., Ladoux, B., Buguin, A. and Silberzan, P. (2007). Collective migration of an epithelial monolayer in response to a model wound. *Proc. Natl. Acad. Sci. USA* **104**, 15988–15993.
- Raab, M., Gentili, M., de Belly, H., Thiam, H.-R., Vargas, P., Jimenez, A. J., Lautenschlaeger, F., Voituriez, R., Lennon-Dumenil, A.-M., Manel, N. et al. (2016). ESCRT III repairs nuclear envelope ruptures during cell migration to limit DNA damage and cell death. *Science* **352**, 359–362.
- Rahmouni, S., Lindner, A., Rechenmacher, F., Neubauer, S., Sobahi, T. R. A., Kessler, H., Cavalcanti-Adam, E. A. and Spatz, J. P. (2013). Hydrogel micropillars with integrin selective peptidomimetic functionalized nanopatterned tops: a new tool for the measurement of cell traction forces transmitted through  $\alpha$ 5 $\beta$ 1- or  $\alpha$ 5 $\beta$ 3-integrins. *Adv. Mater.* **25**, 5869–5874.
- Rao, S. S., Lannutti, J. J., Viapiano, M. S., Sarkar, A. and Winter, J. O. (2014). Toward 3D biomimetic models to understand the behavior of glioblastoma multiforme cells. *Tissue Eng. Part B Rev.* **20**, 314–327.
- Renz, M., Otten, C., Faurobert, E., Rudolph, F., Zhu, Y., Boulday, G., Duchene, J., Mickleit, M., Dietrich, A.-C., Ramspacher, C. et al. (2015). Regulation of  $\beta$ 1 integrin-Klf2-mediated angiogenesis by CCM proteins. *Dev. Cell* **32**, 181–190.
- Reticcker-Flynn, N. E., Malta, D. F. B., Winslow, M. M., Lamar, J. M., Xu, M. J., Underhill, G. H., Hynes, R. O., Jacks, T. E. and Bhatia, S. N. (2012). A combinatorial extracellular matrix platform identifies cell-extracellular matrix interactions that correlate with metastasis. *Nat. Commun.* **3**, 1122.
- Ricoult, S. G., Kennedy, T. E. and Juncker, D. (2015). Substrate-bound protein gradients to study haptotaxis. *Front. Bioeng. Biotechnol.* **3**, 40.
- Roca-Cusachs, P., Gauthier, N. C., del Rio, A. and Sheetz, M. P. (2009). Clustering of  $\alpha$ (5) $\beta$ (1) integrins determines adhesion strength whereas  $\alpha$ (v) $\beta$ (3) and talin enable mechanotransduction. *Proc. Natl. Acad. Sci. USA* **106**, 16245–16250.
- Rodríguez-Fraticelli, A. E., Auzan, M., Alonso, M. A., Bornens, M. and Martín-Belmonte, F. (2012). Cell confinement controls centrosome positioning and lumen initiation during epithelial morphogenesis. *J. Cell Biol.* **198**, 1011–1023.
- Rolli, C. G., Nakayama, H., Yamaguchi, K., Spatz, J. P., Kemkemer, R. and Nakanishi, J. (2012). Switchable adhesive substrates: revealing geometry dependence in collective cell behavior. *Biomaterials* **33**, 2409–2418.
- Rørth, P. (2012). Fellow travellers: emergent properties of collective cell migration. *EMBO Rep.* **13**, 984–991.
- Ross, A. M., Jiang, Z., Bastmeyer, M. and Lahann, J. (2012). Physical aspects of cell culture substrates: topography, roughness, and elasticity. *Small* **8**, 336–355.
- Rossier, O., Oceau, V., Sibarita, J. B., Leduc, C., Tessier, B., Nair, D., Gatterdam, V., Destaing, O., Albigès-Rizo, C., Tampé, R. et al. (2012). Integrins  $\beta$ 1 and  $\beta$ 3 exhibit distinct dynamic nanoscale organizations inside focal adhesions. *Nat. Cell Biol.* **14**, 1057–1067.
- Ru, C. H., Luo, J., Xie, S. R., Sun, Y., Ru, C., Luo, J., Xie, S. and Sun, Y. (2014). A review of non-contact micro- and nano-printing technologies. *J. Microchem. Microeng.* **24**, 053001.
- Ruprecht, V., Wieser, S., Callan-Jones, A., Smutny, M., Morita, H., Sako, K., Barone, V., Ritsch-Marte, M., Sixt, M., Voituriez, R. et al. (2015). Cortical contractility triggers a stochastic switch to fast amoeboid cell motility. *Cell* **160**, 673–685.
- Salaita, K., Wang, Y. and Mirkin, C. A. (2007). Applications of dip-pen nanolithography. *Nat. Nanotechnol.* **2**, 145–155.
- Salaita, K., Nair, P. M., Petit, R. S., Neve, R. M., Das, D., Gray, J. W. and Groves, J. T. (2010). Restriction of receptor movement alters cellular response: physical force sensing by EphA2. *Science* **327**, 1380–1385.
- Sant, S., Hancock, M. J., Donnelly, J. P., Iyer, D. and Khademhosseini, A. (2010). Biomimetic gradient hydrogels for tissue engineering. *Can. J. Chem. Eng.* **88**, 899–911.
- Schiller, H. B., Hermann, M.-R., Polleux, J., Vignaud, T., Zanivan, S., Friedel, C. C., Sun, Z., Raducanu, A., Gottschalk, K.-E., Théry, M. et al. (2013).  $\beta$ 1- and  $\alpha$ v-class integrins cooperate to regulate myosin II during rigidity sensing of fibronectin-based microenvironments. *Nat. Cell Biol.* **15**, 625–636.
- Selhuber-Unkel, C., López-García, M., Kessler, H. and Spatz, J. P. (2008). Cooperativity in adhesion cluster formation during initial cell adhesion. *Biophys. J.* **95**, 5424–5431.
- Serra-Picamal, X., Conte, V., Vincent, R., Anon, E., Tambe, D. T., Bazellieres, E., Butler, J. P., Fredberg, J. J. and Trepast, X. (2012). Mechanical waves during tissue expansion. *Nat. Phys.* **8**, 628–634.
- Shin, Y., Jeon, J. S., Han, S., Jung, G.-S., Shin, S., Lee, S.-H., Sudo, R., Kamm, R. D. and Chung, S. (2011). In vitro 3D collective sprouting angiogenesis under orchestrated ANG-1 and VEGF gradients. *Lab. Chip* **11**, 2175–2181.
- Sim, J. Y., Moeller, J., Hart, K. C., Ramallo, D., Vogel, V., Dunn, A. R., Nelson, W. J. and Pruitt, B. L. (2015). Spatial distribution of cell-cell and cell-ECM adhesions regulates force balance while main-taining E-cadherin molecular tension in cell pairs. *Mol. Biol. Cell* **26**, 2456–2465.
- Smith, M. L., Gourdon, D., Little, W. C., Kubow, K. E., Eguiluz, R. A., Luna-Morris, S. and Vogel, V. (2007). Force-induced unfolding of fibronectin in the extracellular matrix of living cells. *PLoS Biol.* **5**, e268.
- Soiné, J. R., Brand, C. A., Stricker, J., Oakes, P. W., Gardel, M. L. and Schwarz, U. S. (2015). Model-based traction force microscopy reveals differential tension in cellular actin bundles. *PLoS Comput. Biol.* **11**, e1004076.
- Stapleton, S. C., Chopra, A. and Chen, C. S. (2014). Force measurement tools to explore cadherin mechanotransduction. *Cell Commun. Adhes.* **21**, 193–205.
- Strale, P.-O., Duchesne, L., Peyret, G., Montel, L., Nguyen, T., Png, E., Tampé, R., Troyanovsky, S., Hénon, S., Ladoux, B. et al. (2015). The formation of ordered nanoclusters controls cadherin anchoring to actin and cell-cell contact fluidity. *J. Cell Biol.* **210**, 333–346.
- Strale, P.-O., Azioune, A., Bugnicourt, G., Lecomte, Y., Chahid, M. and Studer, V. (2016). Multiprotein printing by light-induced molecular adsorption. *Adv. Mater.* **28**, 2024–2029.
- Sunyer, R., Conte, V., Escribano, J., Elosegui-Artola, A., Labernadie, A., Valon, L., Navajas, D., Garcia-Aznar, J. M., Munoz, J. J., Roca-Cusachs, P. et al. (2016). Collective cell durotaxis emerges from long-range intercellular force transmission. *Science* **353**, 1157–1161.
- Tanaka, M. and Sackmann, E. (2005). Polymer-supported membranes as models of the cell surface. *Nature* **437**, 656–663.
- Tanner, K., Mori, H., Mroue, R., Bruni-Cardoso, A. and Bissell, M. J. (2012). Coherent angular motion in the establishment of multicellular architecture of glandular tissues. *Proc. Natl. Acad. Sci. USA* **109**, 1973–1978.
- te Boekhorst, V., Preziosi, L. and Friedl, P. (2016). Plasticity of cell migration in vivo and in silico. *Annu. Rev. Cell Dev. Biol.* **32**, 491–526.
- Thiam, H.-R., Vargas, P., Carpi, N., Crespo, C. L., Raab, M., Terriac, E., King, M. C., Jacobelli, J., Alberts, A. S., Stradal, T. et al. (2016). Perinuclear Arp2/3-driven actin polymerization enables nuclear deformation to facilitate cell migration through complex environments. *Nat. Commun.* **7**, 10997.
- Thomas, C. H., Collier, J. H., Sfeir, C. S. and Healy, K. E. (2002). Engineering gene expression and protein synthesis by modulation of nuclear shape. *Proc. Natl. Acad. Sci. USA* **99**, 1972–1977.
- Toh, A. G. G., Wang, Z. P., Yang, C. and Nguyen, N.-T. (2014). Engineering microfluidic concentration gradient generators for biological applications. *Microfluid. Nanofluidics* **16**, 1–18.
- Truong Quang, B.-A., Mani, M., Markova, O., Lecuit, T. and Lenne, P.-F. (2013). Principles of E-cadherin supramolecular organization in vivo. *Curr. Biol.* **23**, 2197–2207.

- Tseng, Q., Duchemin-Pelletier, E., Deshiere, A., Balland, M., Guillou, H., Filhol, O. and Thery, M.** (2012). Spatial organization of the extracellular matrix regulates cell-cell junction positioning. *Proc. Natl. Acad. Sci. USA* **109**, 1506-1511.
- Vargas, P., Maiuri, P., Bretou, M., Sáez, P. J., Pierobon, P., Maurin, M., Chabaud, M., Lankar, D., Obino, D., Terriac, E. et al.** (2016). Innate control of actin nucleation determines two distinct migration behaviours in dendritic cells. *Nat. Cell Biol.* **18**, 43-53.
- Vedula, S. R., Ravasio, A., Lim, C. T. and Ladoux, B.** (2013). Collective cell migration: a mechanistic perspective. *Physiology* **28**, 370-379.
- Vega, L. J. C. M., Lee, M. K., Jeong, J. H., Smith, C. E., Lee, K. Y., Chung, H. J., Leckband, D. E. and Kong, H.** (2014). Recapitulating cell-cell adhesion using n-cadherin biologically tethered to substrates. *Biomacromolecules* **15**, 2172-2179.
- Verkhovskiy, A. B., Svitkina, T. M. and Borisy, G. G.** (1999). Self-polarization and directional motility of cytoplasm. *Curr. Biol.* **9**, 11-20.
- Versaevel, M., Grevesse, T. and Gabriele, S.** (2012). Spatial coordination between cell and nuclear shape within micropatterned endothelial cells. *Nat. Commun.* **3**, 671.
- Vignaud, T., Galland, R., Tseng, Q., Blanchoin, L., Colombelli, J. and Thery, M.** (2012). Reprogramming cell shape with laser nano-patterning. *J. Cell Sci.* **125**, 2134-2140.
- Vogel, V. and Sheetz, M.** (2006). Local force and geometry sensing regulate cell functions. *Nat. Rev. Mol. Cell Biol.* **7**, 265-275.
- Wen, J. H., Vincent, L. G., Fuhrmann, A., Choi, Y. S., Hribar, K. C., Taylor-Weiner, H., Chen, S. and Engler, A. J.** (2014). Interplay of matrix stiffness and protein tethering in stem cell differentiation. *Nat. Mater.* **13**, 979-987.
- Wilson, K., Lewalle, A., Fritzsche, M., Thorogate, R., Duke, T. and Charras, G.** (2013). Mechanisms of leading edge protrusion in interstitial migration. *Nat. Commun.* **4**, 2896.
- Wolfenson, H., Meacci, G., Liu, S., Stachowiak, M. R., Iskratsch, T., Ghassemi, S., Roca-Cusachs, P., O'Shaughnessy, B., Hone, J. and Sheetz, M. P.** (2016). Tropomyosin controls sarcomere-like contractions for rigidity sensing and suppressing growth on soft matrices. *Nat. Cell Biol.* **18**, 33-42.
- Wollrab, V., Thiagarajan, R., Wald, A., Kruse, K. and Riveline, D.** (2016). Still and rotating myosin clusters determine cytokinetic ring constriction. *Nat. Commun.* **7**, 11860.
- Wu, C.-C., Reinhoudt, D. N., Otto, C., Subramaniam, V. and Velders, A. H.** (2011). Strategies for patterning biomolecules with dip-pen nanolithography. *Small* **7**, 989-1002.
- Wu, Y., Kanchanawong, P. and Zaidel-Bar, R.** (2015). Actin-delimited adhesion-independent clustering of E-cadherin forms the nanoscale building blocks of adherens junctions. *Dev. Cell* **32**, 139-154.
- Yao, M., Goult, B. T., Chen, H., Cong, P., Sheetz, M. P. and Yan, J.** (2014). Mechanical activation of vinculin binding to talin locks talin in an unfolded conformation. *Sci. Rep.* **4**, 4610.
- Yao, M., Goult, B. T., Klapholz, B., Hu, X., Toseland, C. P., Guo, Y., Cong, P., Sheetz, M. P. and Yan, J.** (2016). The mechanical response of talin. *Nat. Commun.* **7**, 11966.
- Yin, X., Mead, B. E., Safaei, H., Langer, R., Karp, J. M. and Levy, O.** (2016). Engineering stem cell organoids. *Cell Stem Cell* **18**, 25-38.
- Young, J. L. and Engler, A. J.** (2011). Hydrogels with time-dependent material properties enhance cardiomyocyte differentiation in vitro. *Biomaterials* **32**, 1002-1009.
- Yu, C.-h. and Groves, J. T.** (2010). Engineering supported membranes for cell biology. *Med. Biol. Eng. Comput.* **48**, 955-963.
- Yu, C.-h., Law, J. B. K., Suryana, M., Low, H. Y. and Sheetz, M. P.** (2011). Early integrin binding to Arg-Gly-Asp peptide activates actin polymerization and contractile movement that stimulates outward translocation. *Proc. Natl. Acad. Sci. USA* **108**, 20585-20590.
